# Supplementary material for: Alpha-synuclein misfolding as fluid biomarker for Parkinson’s disease measured with the iRS platform
Source: Springer Nature journal article supplement (doi:10.1038/s44321-025-00229-z), 2025-04-25
Supplement: MOESM1 [file 44321_2025_229_MOESM1_ESM.pdf]

## Appendix

### *Alpha-synuclein misfolding as fluid biomarker for Parkinson's disease measured with the iRS platform*

*Martin Schuler<sup>1,2</sup>, Grischa Gerwert<sup>1,2</sup>, Marvin Mann<sup>1,2</sup>, Nathalie Woitzik<sup>1,2</sup>, Lennart Langenhoff<sup>1,2</sup>,  
Diana Hubert<sup>1,2</sup>, Deniz Duman<sup>1,2</sup>, Adrian Höveler<sup>1,2</sup>, Sandy Galkowski<sup>1,2</sup>, Jonas Simon<sup>1,2</sup>, Robin  
Denz<sup>3</sup>, Sandrina Weber<sup>4</sup>, Eun-Hae Kwon<sup>5</sup>, Robin Wanka<sup>1,2</sup>, Carsten Kötting<sup>1,2</sup>, Jörn  
Güldenhaupt<sup>1,2</sup>, Léon Beyer<sup>1,2</sup>, Lars Tönges<sup>5</sup>, Brit Mollenhauer<sup>4,6-7</sup>, Klaus Gerwert<sup>1,2</sup>*

- (1) Center for Protein Diagnostics (PRODI), Ruhr-University Bochum, Bochum, Germany
- (2) Department of Biophysics, Ruhr-University Bochum, Bochum, Germany
- (3) Department of Medical Informatics, Biometry and Epidemiology, Ruhr-University Bochum, Germany
- (4) University Medical Center Göttingen, Department of Neurology, Göttingen, Germany
- (5) Department of Neurology, St. Josef-Hospital, Ruhr-University Bochum, Bochum, Germany
- (6) Paracelsus-Elena-Klinik, Kassel, Germany (Klinikstraße 16, 34128 Kassel, Germany)
- (7) Scientific employee with an honorary contract at Deutsches Zentrum für Neurodegenerative Erkrankungen (DZNE), Göttingen, Germany.

| Appendix<br>Figure | Description                                                                                                           | Page |
|--------------------|-----------------------------------------------------------------------------------------------------------------------|------|
| S1                 | Indirect ELISA for EC <sub>50</sub> -value<br>determination of native and labeled<br>capture antibody                 | 2    |
| S2                 | Logistic regression models for the<br>combined dataset.                                                               | 3    |
| S3                 | Reproducibility measures with a pooled<br>control CSF sample measured on the<br>$\alpha$ Syn capture antibody surface | 4    |
| S4                 | Dataset distribution and conformity to<br>normal distribution by normal Q-Q-Plot of<br>1656.0/1623.5-Ratios           | 5    |

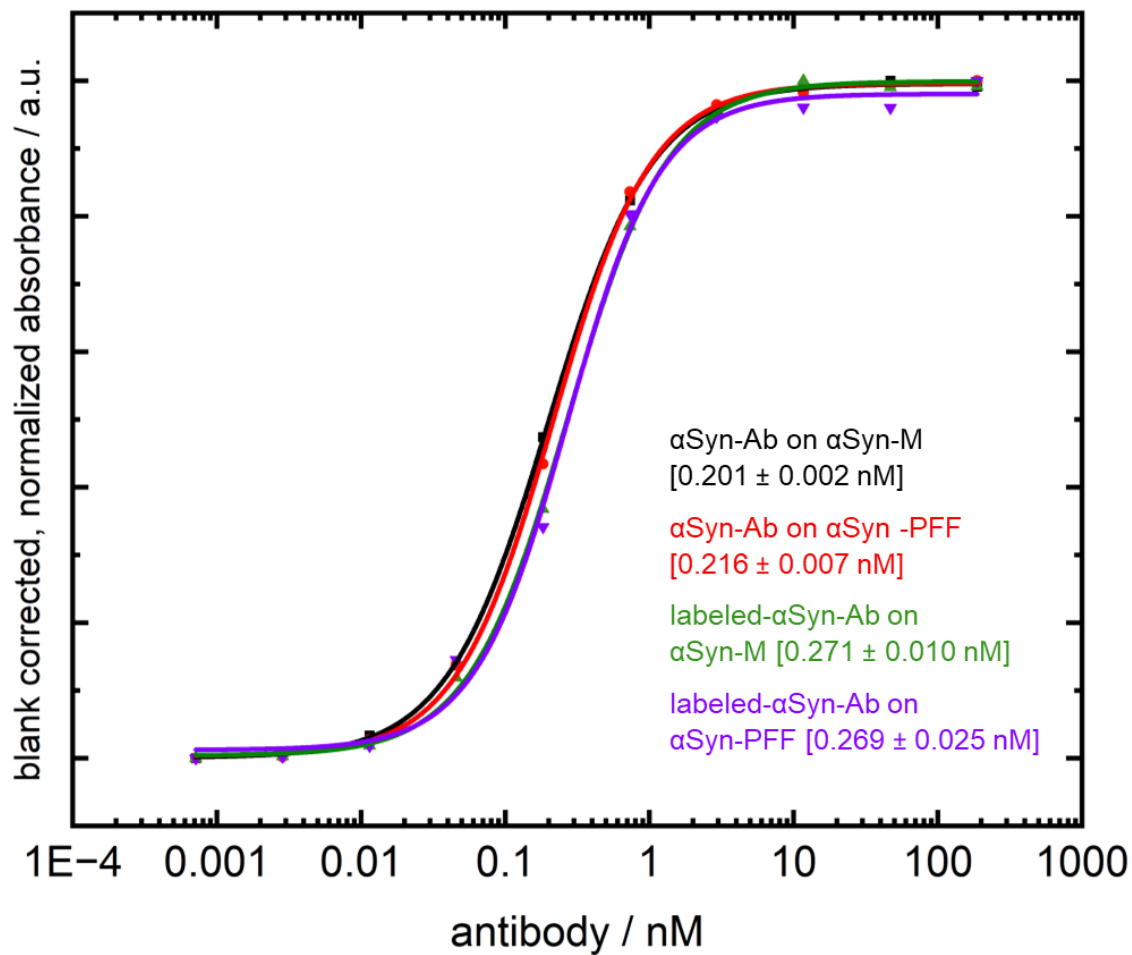

**Appendix Figure S1:** Indirect ELISA for  $EC_{50}$ -value determination of native and labeled capture antibody according to given protocol (EV Materials).  $EC_{50}$ -values were determined from blank corrected absorbance difference at 450 - 620nm using a 4-parameter logistic fit model on normalized data. Values demonstrate the fit results of the native and labeled antibody towards  $\alpha$ Syn-M (Stressmarq Bioscience INC. SPR-321) and  $\alpha$ Syn-PFF (Stressmarq Bioscience INC. SPR-322), as used in the ThT and ATR-FTIR experiments.  $EC_{50}$  values from the 4-parameter logistic fit model are  $0.20 \pm 0.002 \text{ nM}$  and  $0.22 \pm 0.007 \text{ nM}$  for native antibody, while labeled antibody shows  $EC_{50}$  values of  $0.27 \pm 0.010 \text{ nM}$  and  $0.27 \pm 0.025 \text{ nM}$ .

| Characteristic | Demographics    |                     |                     | Demographics + iRS |                     |                     |
|----------------|-----------------|---------------------|---------------------|--------------------|---------------------|---------------------|
|                | OR <sup>1</sup> | 95% CI <sup>1</sup> | p-value             | OR <sup>1</sup>    | 95% CI <sup>1</sup> | p-value             |
| Age            | 1.020           | 0.988, 1.055        | 0.2                 | 1.027              | 0.986, 1.076        | 0.2                 |
| Gender         |                 |                     |                     |                    |                     |                     |
| m              | —               | —                   |                     | —                  | —                   |                     |
| w              | 0.264           | 0.119, 0.564        | $7.5 \cdot 10^{-4}$ | 0.298              | 0.105, 0.817        | 0.020               |
| readout10      |                 |                     |                     | 0.030              | 0.006, 0.101        | $5.6 \cdot 10^{-7}$ |

<sup>1</sup>OR = Odds Ratio, CI = Confidence Interval

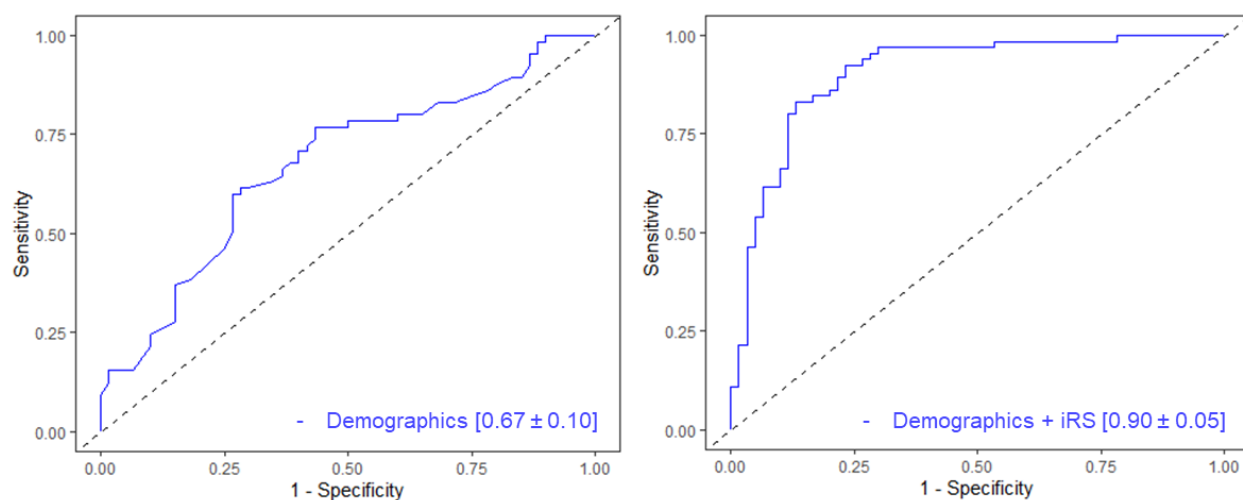

**Appendix Figure S2:** Logistic regression models for the combined dataset. The first model, "Demographics" accounts for age and sex only, while the second model "Demographics + iRS," also accounts for the iRS assay read-out. The clinical diagnosis is always used as the dependent variable. Calculated models with characteristics in the upper table were utilized to calculate ROC-AUC curves for both models. The demographics-only model showed an AUC of  $0.67 \pm 0.10$  (p-value  $7.5 \cdot 10^{-4}$ ), while with additional iRS read-out, the AUC increased to  $0.90 \pm 0.05$  (p-value  $5.6 \cdot 10^{-7}$ ). The shown p-values were calculated using a standard Wald test.

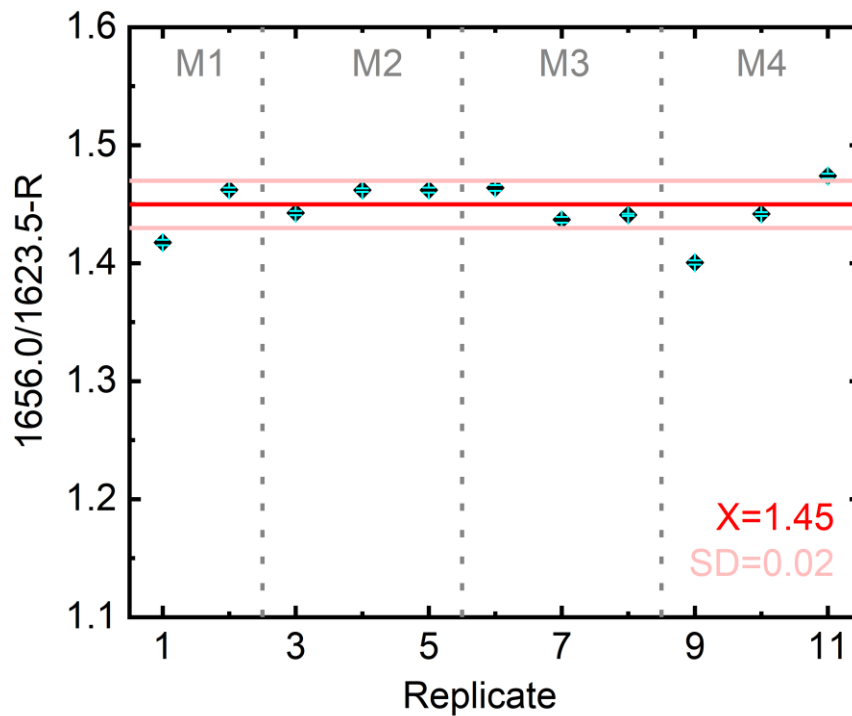

**Appendix Figure S3:** Reproducibility measures with a pooled control CSF sample measured on the  $\alpha$ Syn capture antibody surface. The eleven replicates were measured in four measurements (M1-M4). Routine spectra processing (WV and baseline correction, averaging spectra and reference channel subtraction, Fourier self-deconvolution (FSD), and smoothing) was performed. Each replicate is depicted with an error bar (cyan) obtained from applying a smoothing variation by the in-house MATLAB script for data analysis. The mean 1656.0/1623.5-ratio of all measurements was  $\bar{X}=1.45$  with a standard deviation of  $SD=0.02$ .

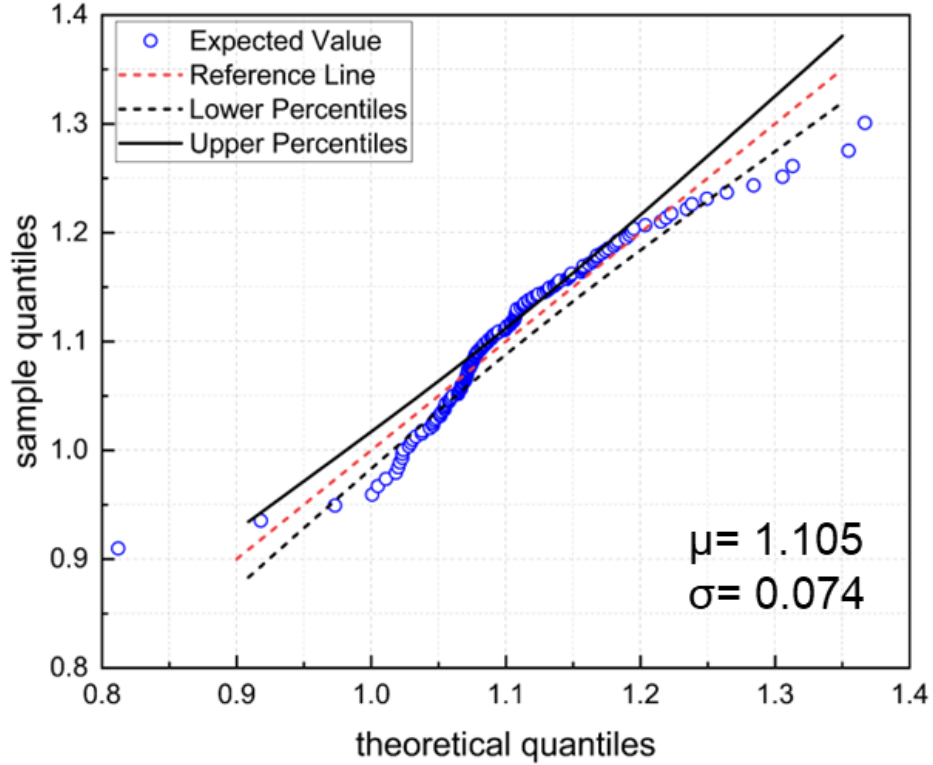

**Appendix Figure S4:** Dataset distribution and conformity to normal distribution by normal Q-Q-Plot of 1656.0/1623.5-Ratios. The mean of the normal distribution is  $\mu=1.105$  with a standard deviation of  $\sigma=0.074$  for the normal distribution. Lower and upper percentiles (black line and dashed black line) mark 95 %-confidence bands, while the red dashed line shows the reference line. Since a considerable amount of data points of the combined data set ( $n=134$ ) are not located within the confidence borders, the dataset is not normally distributed. Thus, non-parametric models were applied to test the significance of group separations.
